# Supplementary material for: COVID-19 Vaccination and Incidence of Pediatric SARS-CoV-2 Infection and Hospitalization
Source: PubMed Central journal article supplement (PMC11040406; doi:10.1001/jamanetworkopen.2024.7822), 2024-04-23
Supplement: jamanetwopen-e247822-s002.pdf [file jamanetwopen-e247822-s002.pdf]

## Data Sharing Statement

Head. COVID-19 Vaccination and Incidence of Pediatric SARS-CoV-2 Infection and Hospitalization. *JAMA Netw Open*. Published April 23, 2024.

doi:10.1001/jamanetworkopen.2024.7822

### Data

**Data available:** No

### Additional Information

**Explanation for why data not available:** Data was obtained via an arrangement with California Department of Public Health. Data may be made available upon request to California Department of Public Health.
